# Supplementary material for: Relationship between hair cortisol and plasma heat shock proteins in response to heat stress in resilient and sensitive cattle breeds
Source: Research Square preprint supplement (doi:10.21203/rs.3.rs-8492018/v1), 2026-01-23
Supplement: Supplementary file 1 [file 4f43226ede56e21a36ff7486.docx]

**Supplementary material**

**Relationship between hair cortisol and plasma heat shock proteins in response to heat stress in resilient and sensitive cattle breeds**

Luís G. Capela1,2,3,4, Inês C. Leites 2,3, Luísa M. Mateus2,3, Ricardo P. Romão4, A. Pereira 4,Rosa MLN. Pereira 2,3,4*, Luís Lopes-da-Costa2,3*

Table 1. Results of final statistical models used in the analysis with fixed effects Breed, Season and Breed*Season (I), and of the interactions between Breed, THI60 and HSP (II).

|  | | | | | |  | | | **Fixed effect p-value** | | | | | | **PROC** | | | |
| --- | --- | --- | --- | --- | --- | --- | --- | --- | --- | --- | --- | --- | --- | --- | --- | --- | --- | --- |
| **Model** | **Dependent Variable** | **Model r2** | | **Model**  **p-value** | | **Season** | | | | | **Breed** | | **Breed*season** | |  | | | |
| y = Breed +Season +Breed*Season | Vaginal | 0.34 | | <0.0001 | | <0.0001 | | | | | <0.0001 | | 0.01 | | GLM | | | |
| OcularMed | 0.42 | | <0.001 | | <0.0001 | | | | | 0.0012 | | <0.0001 | | GLM | | | |
| Cortisol | 0.23 | | <.0001 | | 0.002 | | | | | <0.0001 | | 0.13 | | GLM | | | |
| T3 | 0.20 | | <0.0001 | | <0.0001 | | | | | 0.02 | | 0.008 | | GLM | | | |
| T4 | 0.27 | | <0.001 | | 0.06 | | | | | <0.0001 | | 0.09 | | GLM | | | |
| BHB | 0.27 | | <0.0001 | | 0.03 | | | | | <0.0001 | | 0.1 | | GLM | | | |
| HSP60 | - | | - | | <0.0001 | | | | | 0.02 | | 0.43 | | Glimmix negBin | | | |
| HSP70 | - | | - | | <0.0001 | | | | | 0.02 | | <0.0001 | | Glimmix negBin | | | |
| HSP90 | - | | - | | 0.0001 | | | | | 0.31 | | 0.02 | | Glimmix negBin | | | |
|  |  | |  | |  | | | | |  | |  | |  | | | |
| **Model** | **Dependent variable** | | **Model r2** | | **Model**  **p-value** | | **Breed** | **Cortisol** | | **THI60** | | **Breed*THI60** | | **Breed*Cortisol** | | **THI60*Cortisol** | **Breed*Cortisol*THI60** |  |
| Y= Breed +THI60 Cortisol +Breed*THI60 +Breed*Cortisol +THI60*Cortisol Breed*THI60*Cortisol | HSP60 | | - | | - | | 0.05 | 0.01 | | 0.0003 | | 0.05 | | 0.05 | | 0.02 | 0.04 | Glimmix negBin |
| HSP70 | | - | | - | | 0.16 | 0.63 | | 0.05 | | 0.17 | | 0.61 | | 0.64 | 0.6 | Glimmix negBin |
| HSP90 | | - | | - | | 0.003 | 0.8 | | 0.34 | | 0.004 | | 0.02 | | 0.78 | 0.01 | Glimmix negBin |
| Y=Breed THI60 Breed*THI60 | HSP70 | | - | | - | | <0.0001 | - | | <0.0001 | | 0.0001 | | - | | - | - | Glimmix negbin |
